# Supplementary material for: Unbiased discovery of in vivo imaging probes through in vitro profiling of nanoparticle libraries
Source: Royal Society of Chemistry journal article supplement (doi:10.1039/b821775k), 2009-01-01

## **Supplementary Material**

Supplementary Figure S1. Structures of the anhydrides that were conjugated to nanoparticles in this study.

### Supplementary Figure S1

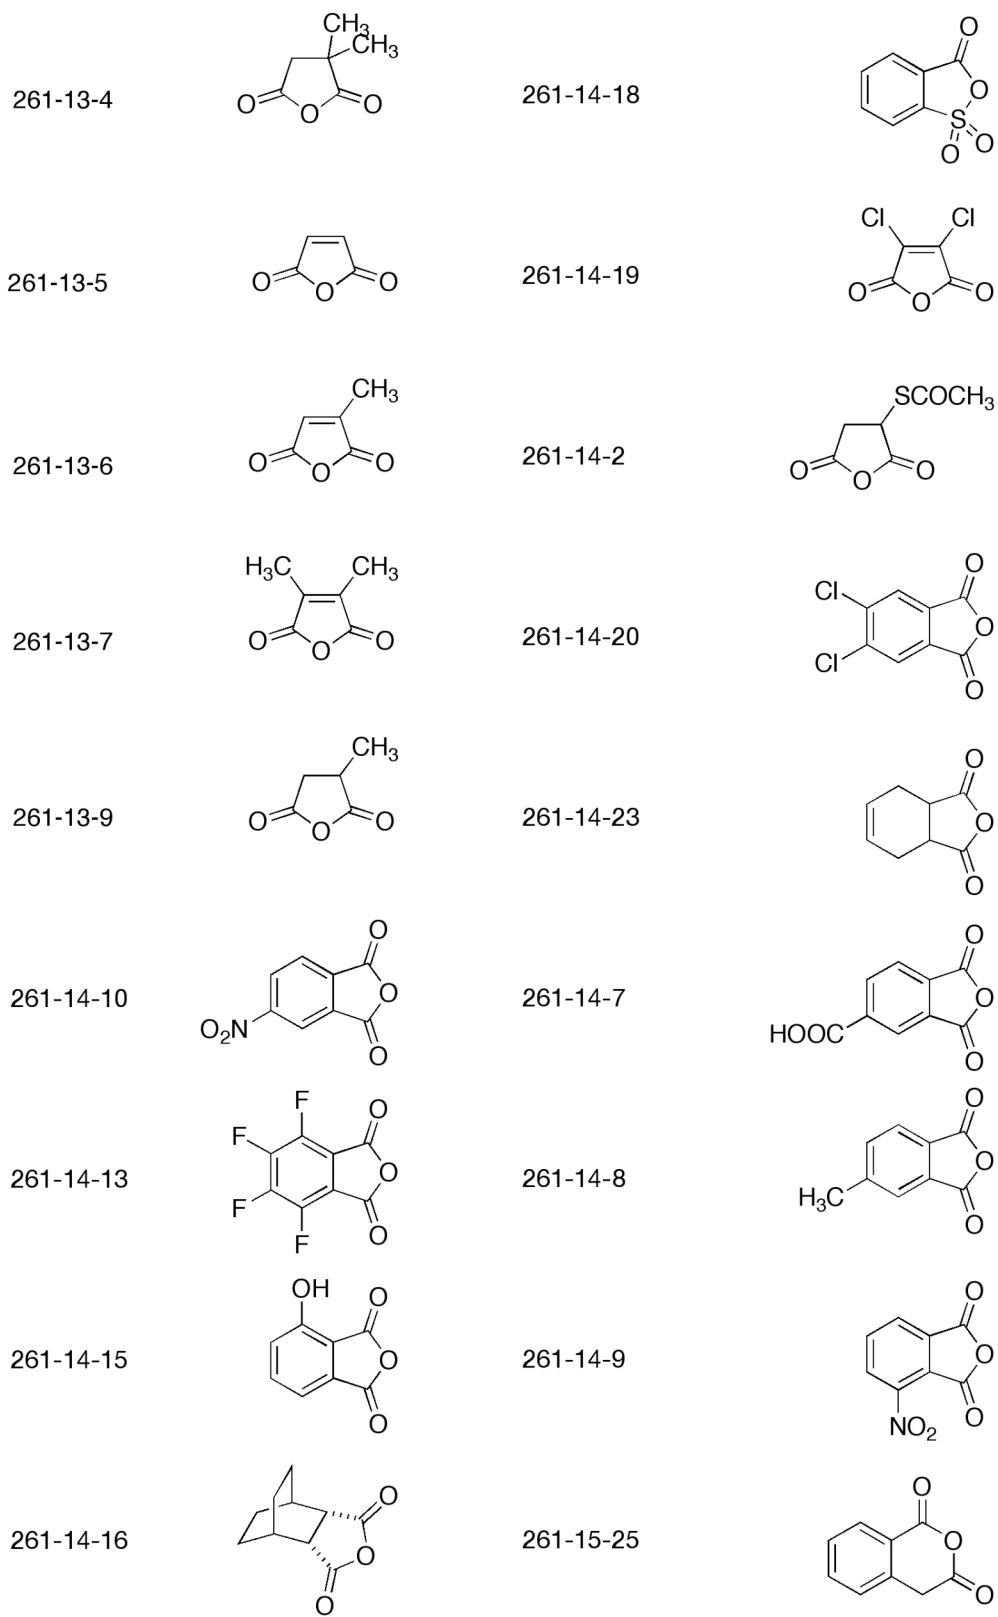

### Supplementary Figure S1 (cont.)

261-15-26

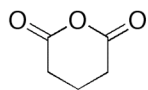

261-15-28

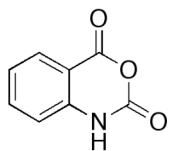

261-15-30

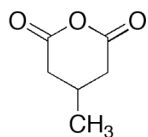

261-15-31

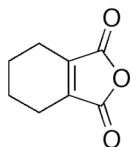

261-15-32

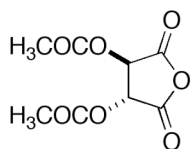

261-16-1

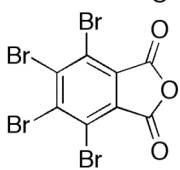

261-16-10

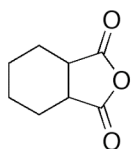

261-16-11

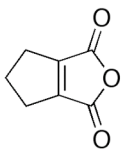

261-16-3

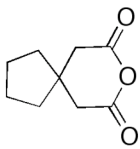

261-16-4

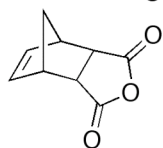

261-16-6

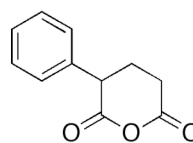

261-16-7

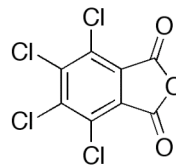

261-16-8

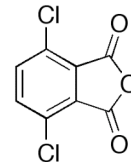

261-16-9

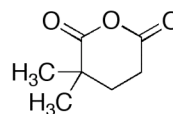

261-9-1

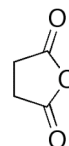

261-9-3

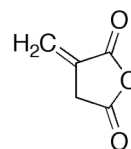

261-9-4

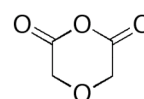

261-9-5

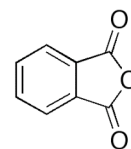

261-9-6

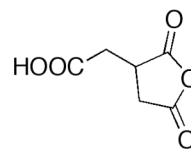

261-9-7

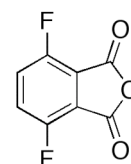

Supplement: b821775k.pdf [file b821775k.pdf]
